# Supplementary material for: Signatures of Adaptation in Human Invasive Salmonella Typhimurium ST313 Populations from Sub-Saharan Africa
Source: PLoS Negl Trop Dis. 2015 Mar 24;9(3):e0003611. doi: 10.1371/journal.pntd.0003611 (PMC4372345; doi:10.1371/journal.pntd.0003611)
Supplement: S2 Table — Boundaries of deleted loci are indicated in the first two columns. SL1344 gene names when not given are abbreviated to SLxxxx. (XLS) [file pntd.0003611.s008.xls]

## Sheet: Sheet3
Start	End	Size of deletion (bp)	SL1344 annotation	Selected genes within deleted loci	Annotation information	Found in		Phylogenetic lineage	Country of origin
64228	66329	2101	SL0055,SL0056	SL0056,SL0056	Putative glucaconyl-CoA alpha and beta subunits	All isolates		I, II, Group III	mixed
188507	189333	826	SL0160	SL0160	HNH endonuclease	P30		II	Mali
311863	313255	1392	SL2066	sciG	SPI-6 associated protein	J3		II	Mali
386302	390511	4209	SL00338-SL0341	Rtn	Membrane-associated loci	A21,D71,D83,I3,I45		II	Mali
582864	584670	1806	SL0515-SL0516	ybbw, allB	allantoin metabolism and transport	Lineage II		II	Mali, Nigeria, Kenya, DRC, Malawi, Mozambique, Uganda
783394	792770	9376	SL0700-SL0708		Contain an O-antigen export system, permease protein	P30, A21		II	Mali
829681	832106	2425	SL0743-SL0745	oadG2, oadA, oadB2	oxaloacetate decarboxylase loci	All isolate		I, II, Group III	mixed*
1136415	1137125	710	SL1031-SL1033	C-terminal of pipD	1304 bases from the C-terminus of PipD	Lineage II		II	Mali, Nigeria, Kenya, DRC, Malawi, Mozambique, Uganda
1367534	1368163	629	SL1266	rfc	o-antigen polymerase	A20, A40, P30		II	Mali
1574019	1575689	1670	SL1471 - SL1472	contains an alcohol dehydrogenase		J17		II	Mali
1581727	1585970	4243	SL1477-SL1483		contains plasmid stability proteins	Lineage II		II	Mali, Nigeria, Kenya, DRC, Malawi, Mozambique, Uganda
1582100	1582801	701	SL1477	putative isomerase	part of a putative phage loci	Lineage I		I	Kenya, Uganda, Malawi, DRC, Mozambique
1587007	1588812	1805	SL1484		Conserved hypothetical	5597		I	Kenya
1648015	1658335	10320	SL1503A-SL1541	sifB, tehAB	SifB, TehAB - tellurite resistance protein	P78		II	Mali
1821491	1823377	1886	SL1694-SL1695	narX, nark	nitrate/nitrite response regulation	5912		I	Kenya
1915795	1925493	9698	SL1792-SL1806	pagO and pagM	Virulence associated proteins	Lineage II		II	Mali, Nigeria, Kenya, DRC, Malawi, Mozambique, Uganda
1994446	2000159	5713	SL1876-SL1882	sirA, sdiA	invasion regulator; cell division regulator	A13198		II	Malawi
2163565	2168577	5012	SL2062-SL2067	rfbNUVXJ	contains a putative O-antigen transporter (RfbX)	D83, DT2B		II	Mali and a GG isolate
*2346334	2351184	4850	SL2223A-SL2224	ccmABCDEFG(2)	cytochrome c-type biogenesis	All isolates		I, II, Group III	Mixed*
*4034692	4039939	5247	SL3780-SL3813	ccmABCDEFGH(I)	cytochrome c-type biogenesis	All isolates		I, II, Group III	Mixed*
4072736	4074433	1697	SL3812-SL3813		Virulence associated proteins	A20, A40, P30, D83		II	Mali
4395651	4397995	2344	SL4094-SL4097		Conserved hypothetical region	D71, P30, D83		II	Mali
4498490	4503988	5498	SL4193-SL4196		SPI-4 associated secreted proteins	A30, A21, A40, P30		II	Mali
4520076	4521935	1859	SL4197		SPI-4 associated protein	A20, A40, A21, P30, D71, D83		II	Mali
*Detected within the constraints of maximum insert size of ilumina libraries and mapping algorithm used for short reads
