# Supplementary material for: Signatures of Adaptation in Human Invasive Salmonella Typhimurium ST313 Populations from Sub-Saharan Africa
Source: PLoS Negl Trop Dis. 2015 Mar 24;9(3):e0003611. doi: 10.1371/journal.pntd.0003611 (PMC4372345; doi:10.1371/journal.pntd.0003611)
Supplement: S3 Table — Single asterisks indicate pseudogenes common to all isolates within a particular lineage. Lineages without asterisks indicate branches leading to terminal nodes. Gene categories were identified using Artemis-based gene classification scheme. SL1344 gene names when not given are abbreviated to SLxxxx. (XLS) [file pntd.0003611.s009.xls]

## Sheet: Sheet1
CDS in SL1344	Product	Gene Category	Nucleotide Change	Type	Lineage
SL1873	putative exported protein	Surface/Secreted proteins	C-A	Nonsense	I, II
ratB	putative outer membrane protein (RatB) (pseudogene)	Surface/Secreted proteins	G-A	Nonsense	I, II
SL2747A	putative transposase (pseudogene)	Phage/IS elements	G-A	Nonsense	I, II
ttdA	tartrate dehydratase	Energy Metabolism	G-A	Nonsense	I, II
SL2990	possible regulatory protein	Regulators	cgatc-c	Deletion	I, II
SL3733	putative transferase	Central/Intermediary/miscellaneous metabolism	tt-t	Deletion	I, II
SL1475	putative monoxygenase	Miscellaneous functions	aagt-a	Deletion	I, II
SL3051	possible ABC-transport protein, ATP-binding component	Surface/Secreted proteins	gg-g	Deletion	I, II
SL2653	conserved hypothetical protein	Conserved hypothetical protein	g-gG	Insertion	I, II
prfH	putative peptide chain release factor	Information transfer	C-T	Nonsense	I*
phnT	probable ATP-binding component of 2-aminoethylphosphonate transporter	Surface/Secreted proteins	C-T	Nonsense	I*
ybjZ	conserved hypothetical ABC transporter	Surface/Secreted proteins	G-A	Nonsense	I*
SL1567	putative membrane protein	Surface/Secreted proteins	C-T	Nonsense	I*
mdaA	oxygen-insensitive NADPH nitroreductase (pseudogene)	Central/Intermediary/miscellaneous metabolism	C-T	Nonsense	I
cedA	cell division activator CedA	Pathogenicity/Adapatation/Chaperones	C-T	Nonsense	I
SL3013	conserved hypothetical protein	Conserved hypothetical protein	C-T	Nonsense	I
pepT	Peptidase T	Degradation of large molecules	G-T	Nonsense	I
hilC	possible AraC-family transcriptional regulator (SPI1-associated)	Pathogenicity/Adapatation/Chaperones	C-A	Nonsense	I
SL2208	putative lipopolysaccharide modification acyltransferase	Surface/Secreted proteins	G-T	Nonsense	I
SL4152	hypothetical protein	Pathogenicity/Adapatation/Chaperones	G-A	Nonsense	I
SL1688	putative secreted protein	Surface/Secreted proteins	G-A	Nonsense	I
amyA	cytoplasmic alpha-amylase	Degradation of large molecules	G-A	Nonsense	I
sspH2	secreted effector protein	Pathogenicity/Adapatation/Chaperones	C-T	Nonsense	I
SL4345	putative sugar transporter	Surface/Secreted proteins	T-A	Nonsense	I
bcfB	fimbrial chaperone	Surface/Secreted proteins	G-A	Nonsense	I
SL1873	putative exported protein	Surface/Secreted proteins	C-T	Nonsense	I
adiY	putative AraC family regulatory protein	Regulators	G-A	Nonsense	I
srfB	putative virulence effector protein	Pathogenicity/Adapatation/Chaperones	T-G	Nonsense	I
fliY	cystine-binding periplasmic protein (FliY)	Surface/Secreted proteins	G-A	Nonsense	I
SL3360	putative exported protein	Surface/Secreted proteins	G-A	Nonsense	I
rpoS	RNA polymerase sigma subunit RpoS (sigma-38)	Regulators	C-A	Nonsense	I
SL1567	putative membrane protein	Surface/Secreted proteins	G-A	Nonsense	II*
SL2659	conserved hypothetical protein	Conserved hypothetical protein	C-A	Nonsense	II*
yhjU	putative membrane protein	Surface/Secreted proteins	G-A	Nonsense	II*
SL4223	putative membrane-bound beta-hydroxylase	Surface/Secreted proteins	C-A	Nonsense	II*
SL2214	putative phage protein	Conserved hypothetical protein	ac-aCc;	Insertion	II*
yadE	conserved hypothetical protein	Surface/Secreted proteins	G-A	Nonsense	II
SL4256	putative exported protein	Surface/Secreted proteins	C-T	Nonsense	II
SL2243	putative transmembrane transpot protein	Central/Intermediary/miscellaneous metabolism	C-T	Nonsense	II
mdaA	oxygen-insensitive NADPH nitroreductase (pseudogene)	Information transfer	G-A	Nonsense	II
hepA	probable ATP-dependent helicase HepA	Regulators	C-A	Nonsense	II
manZ	putative mannose specific permease	Surface/Secreted proteins	G-A	Nonsense	II
SL1688	putative secreted protein	Unknown function	G-A	Nonsense	II
SL1188	hypothetical protein	Surface/Secreted proteins	G-A	Nonsense	II
SL1149	putative secreted protein	Surface/Secreted proteins	C-G	Nonsense	II
rfc	O-antigen polymerase	Conserved hypothetical protein	G-C	Nonsense	II
SL0878	conserved hypothetical protein	Pathogenicity/Adapatation/Chaperones	G-A	Nonsense	II
ratA	putative exported protein (RatA)	Information transfer	C-T	Nonsense	II
nlpD	lipoprotein NlpD precursor	Information transfer	G-A	Nonsense	II
ada	ADA regulatory protein	Central/Intermediary/miscellaneous metabolism	G-A	Nonsense	II
nrdF	ribonucleoside-diphosphate reductase 2 beta chain	Central/Intermediary/miscellaneous metabolism	G-A	Nonsense	II
mdaA	oxygen-insensitive NADPH nitroreductase (pseudogene)	Degradation of small molecules	G-A	Nonsense	II
SL3103	possible aldehyde dehydrogenase	Phage/IS elements	G-T	Nonsense	II
